# Supplementary material for: Strengthening Vector Control Programs through Workforce Capacity Assessment in Central Java Province Indonesia
Source: Research Square preprint supplement (doi:10.21203/rs.3.rs-7894846/v1), 2025-11-07
Supplement: Supplementary file 1 [file 2870c519282256a9de6ddc2e.docx]

**APPENDIX**

**Appendix 1**. Consolidated Criteria for Reporting Qualitative Studies (COREQ)

| **No** | **Item** | **Description** |
| --- | --- | --- |
| **Domain 1: Research team and reflexivity** | | |
| Personal Characteristics | | |
| 1 | Interviewer | Sidiq Setyo Nugroho |
| 2 | Credentials | S.Si., M.Sc. |
| 3 | Occupation | Researcher, Civil Apparatus |
| 4 | Gender | Male |
| 5 | Experience & training | Managing national surveys, training for vector species identification, scientific publication |
| Relationship with participants | | |
| 6 | Relationship established | Some participants had acquaintance with the interviewer |
| 7 | Participant knowledge of the interviewer | The researcher is a student in a master’s degree program, a civil apparatus, doing research for a thesis |
| 8 | Interviewer characteristics | The researcher has a personal interest in the topic |
| **Domain 2: Study design** | | |
| Theoretical framework | | |
| 9 | Methodological orientation and theory | Phenomenology |
| Participant selection | | |
| 10 | Sampling | Purposive |
| 11 | Method of approach | Whatsapp messaging |
| 12 | Sample size | 29 participants |
| 13 | Non-participation | None |
| Setting | | |
| 14 | The setting of data collection | Workplace |
| 15 | Presence of non-participants | Sometimes colleagues are present when the interview proceeding |
| 16 | Description of sample | Related to vector control programs |
| Data collection | | |
| 17 | Interview guide | The questionnaire, not pilot tested |
| 18 | Repeat interviews | No |
| 19 | Audio/visual recording | Audio recording |
| 20 | Field notes | Yes |
| 21 | Duration | 50 minutes on average |
| 22 | Data saturation | No |
| 23 | Transcript returned | Yes |
| **Domain 3: analysis and findings** | | |
| Data analysis | | |
| 24 | Number of data coders | 1 |
| 25 | Description of the coding tree | Yes |
| 26 | Derivation of themes | Identified in advance |
| 27 | Software | NVivo 12 Pro |
| 28 | Participants checking | Yes |
| Reporting | | |
| 29 | Quotations presented | Quotations present to illustrate themes |
| 30 | Data and findings consistent | Yes |
| 31 | Clarity of major themes | Yes |
| 32 | Clarity of minor themes | Yes |
